# Supplementary material for: Cytoskeletal tension actively sustains the migratory T cell synaptic contact
Source: bioRxiv or medRxiv preprint supplement (doi:10.1101/437236), 2019-05-04

# Supp. fig.1

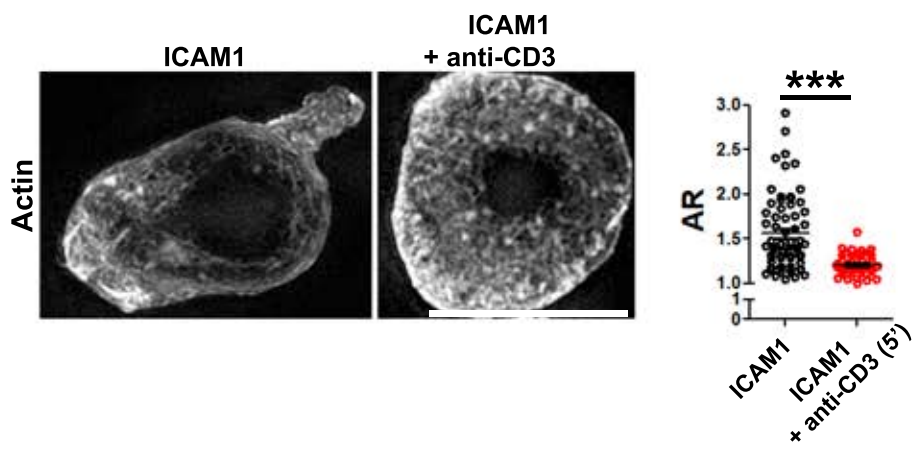

# Supp. fig.2

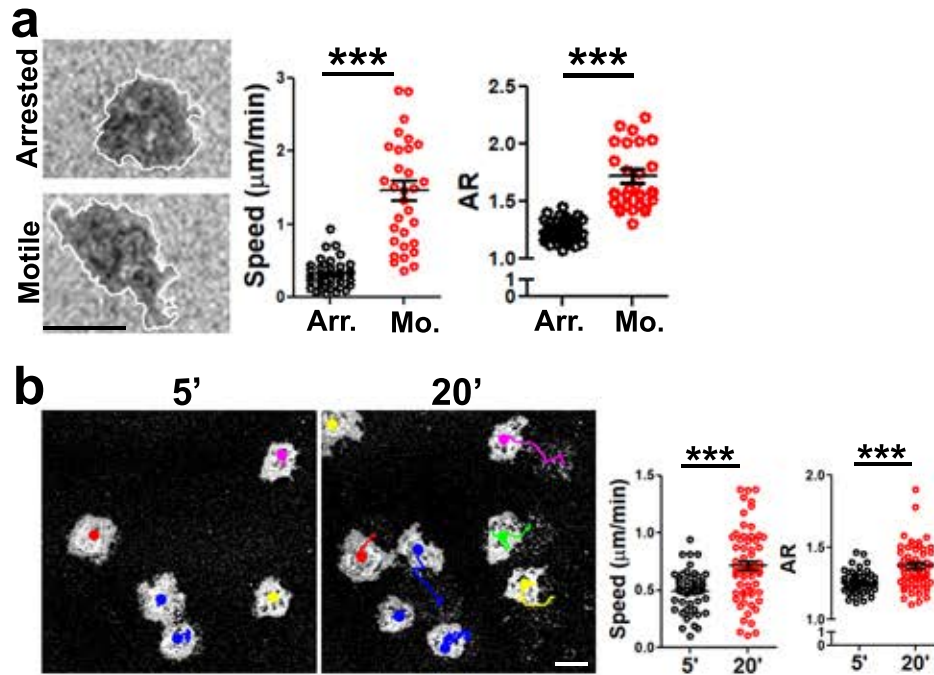

# Supp. fig.3

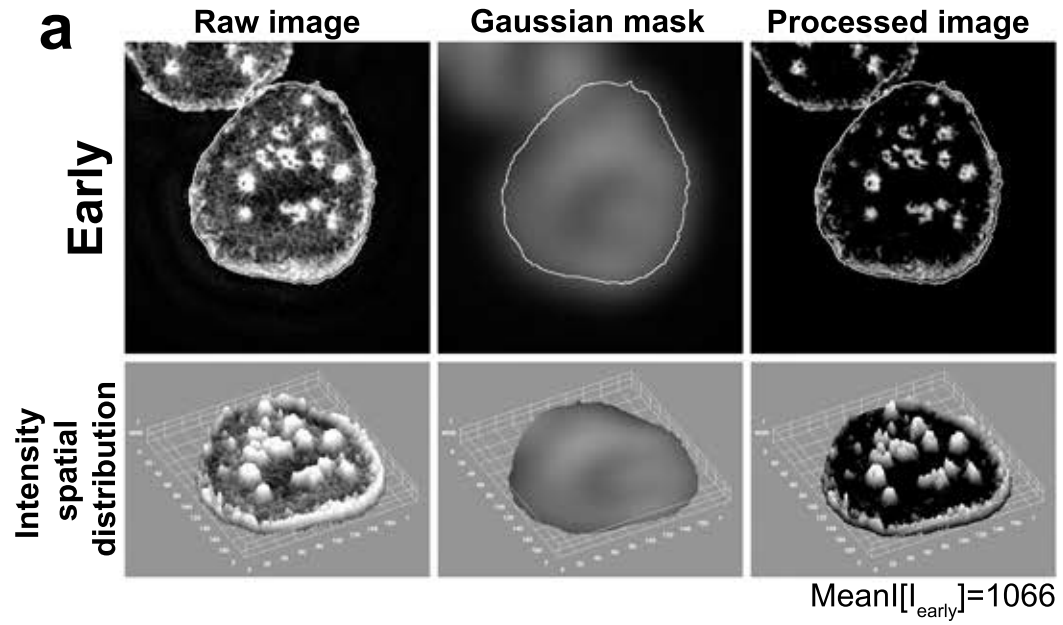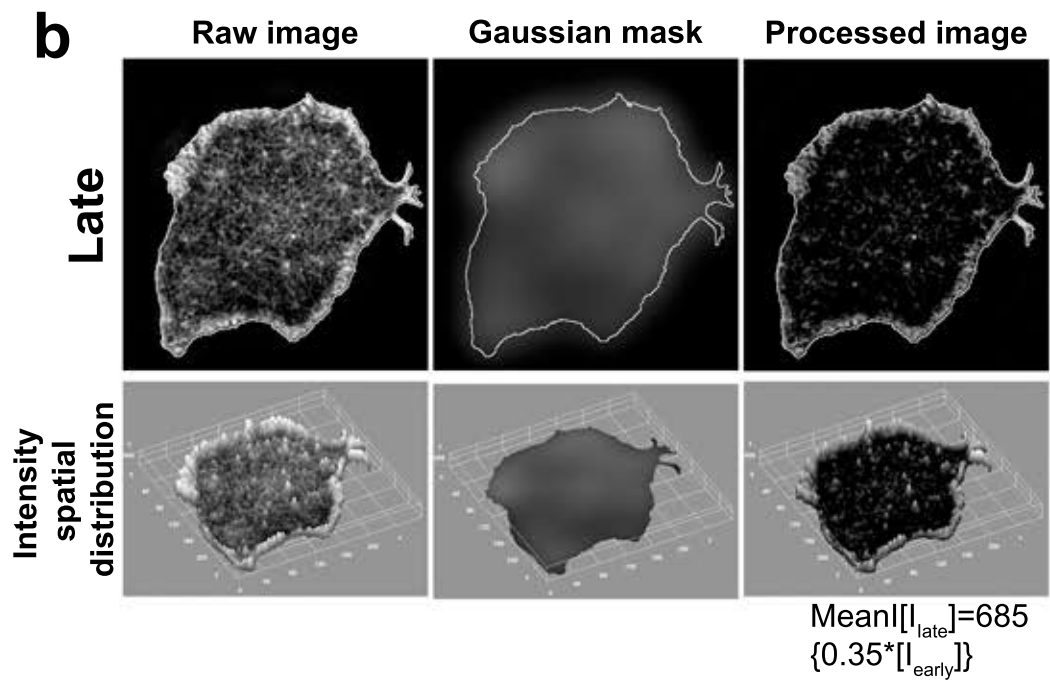

# Supp. fig.4

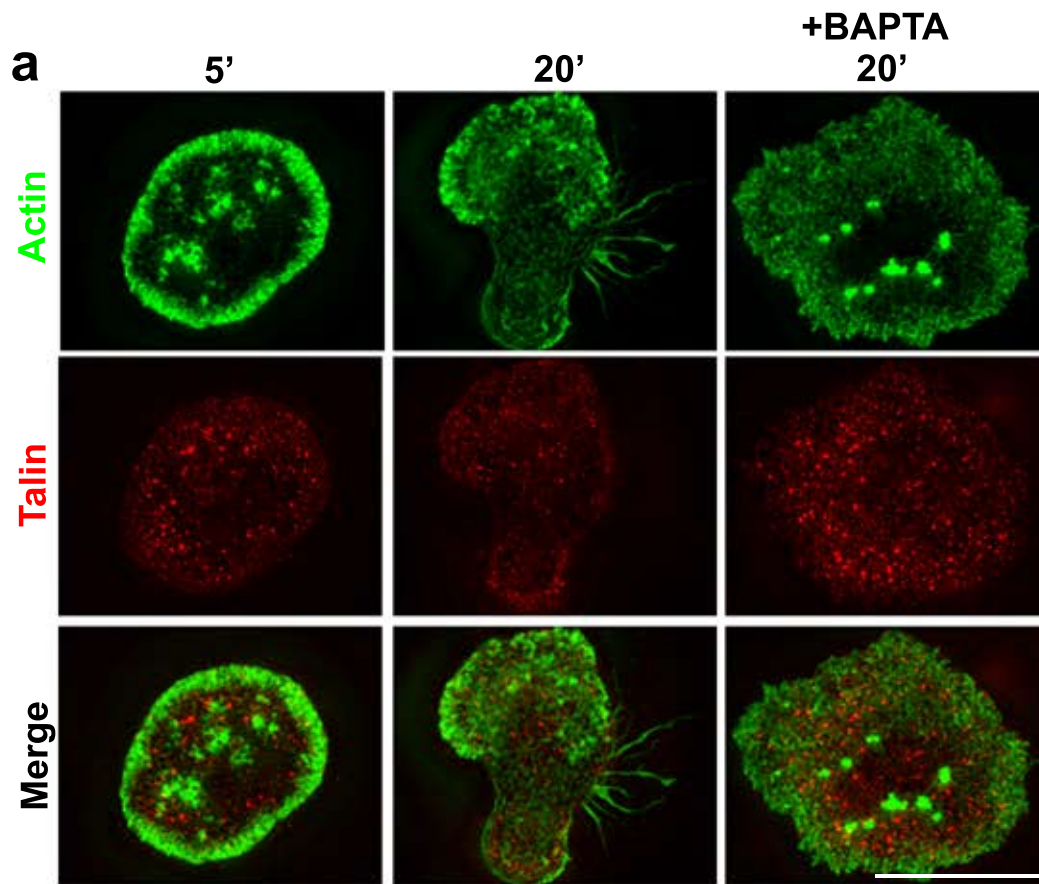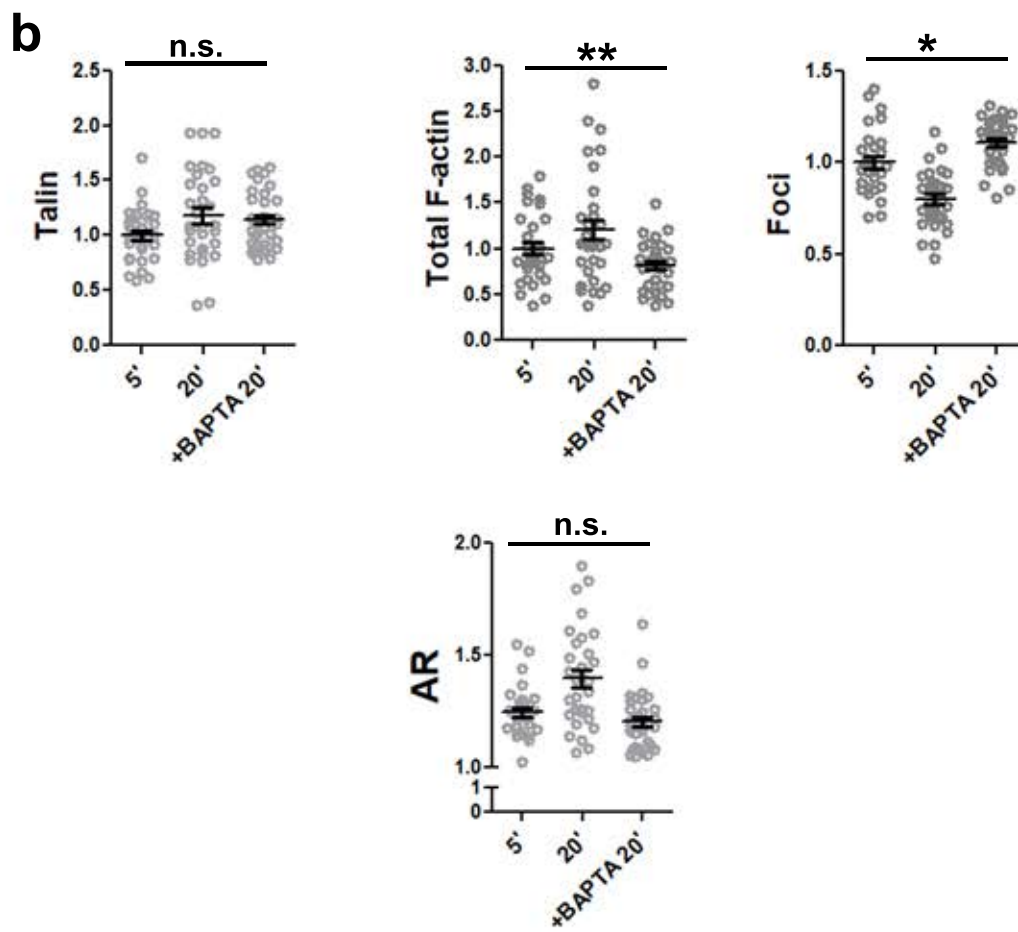

# Supp. fig.5

**a**

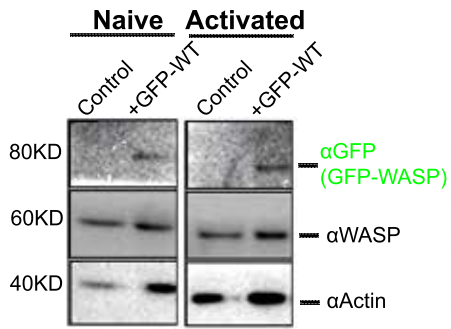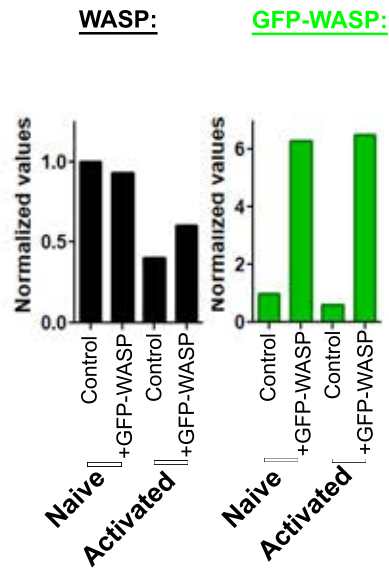

**b**

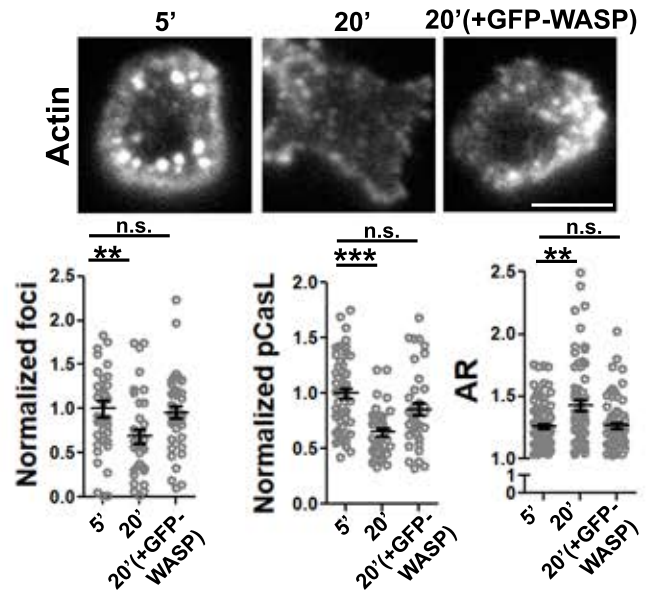

# Supp. fig.6

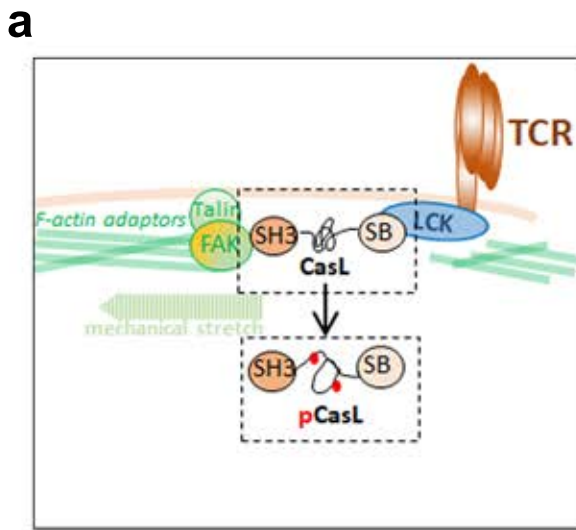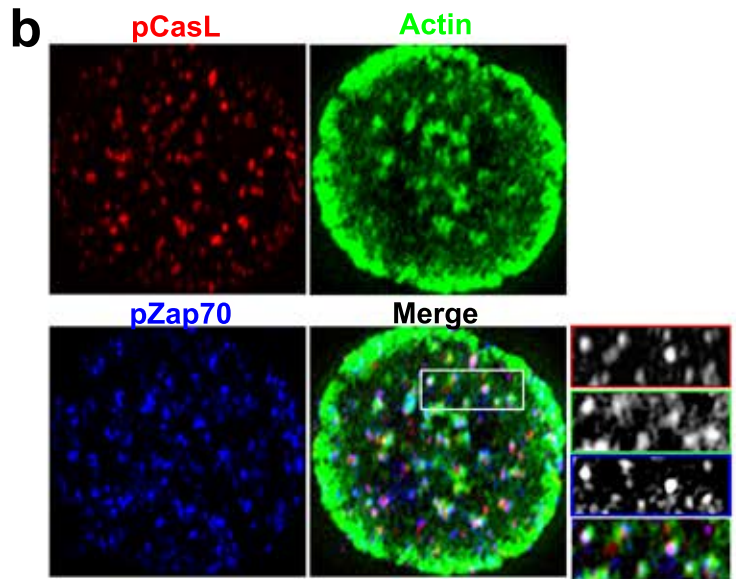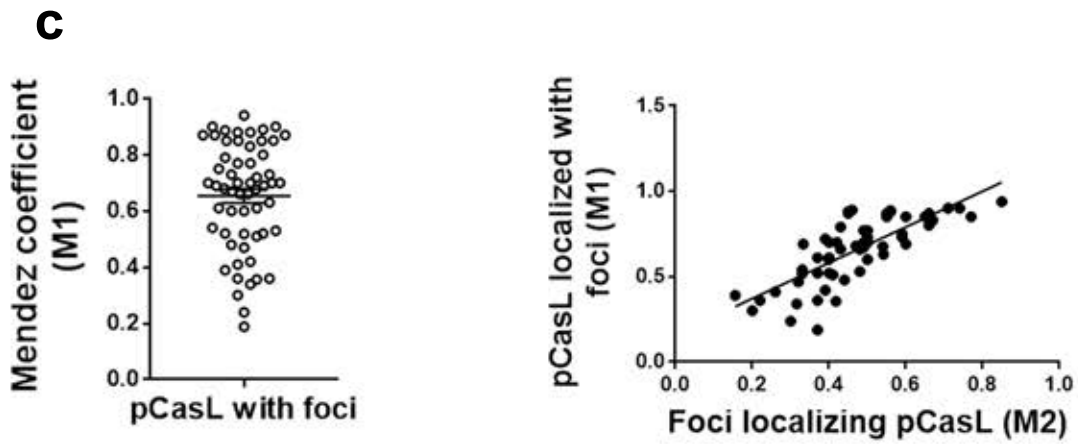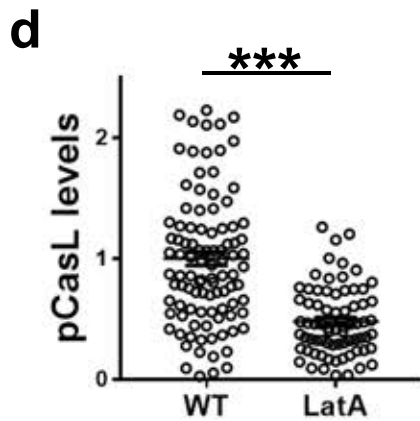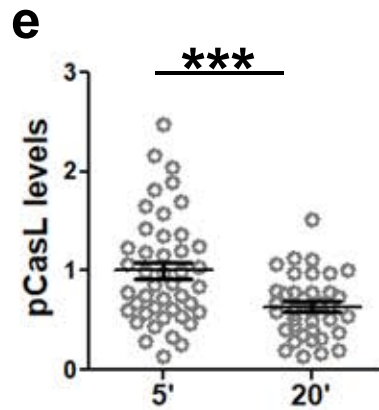

# Supp. fig.7

**a**

Adhesion:

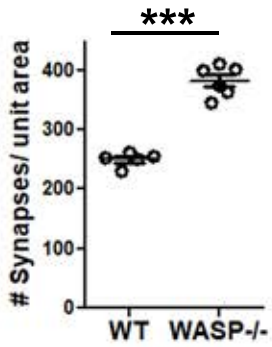

Spreading:

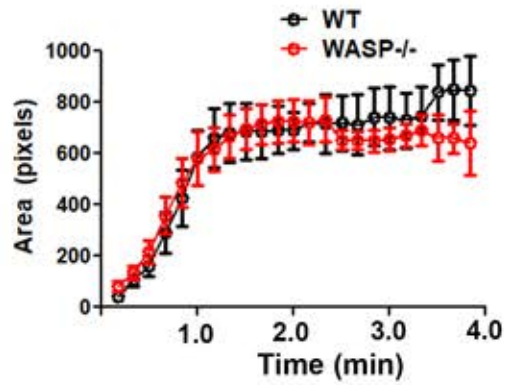

Polarization (AR):

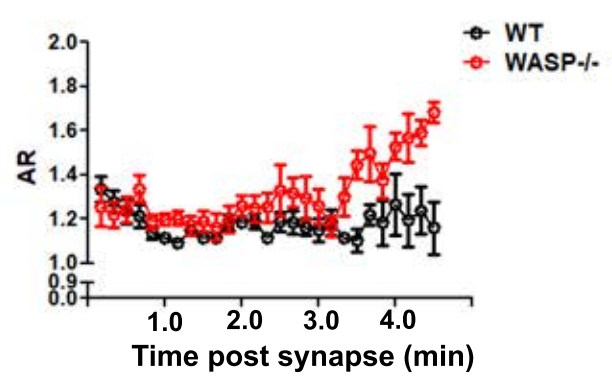

**b**

WT

WASP-/-

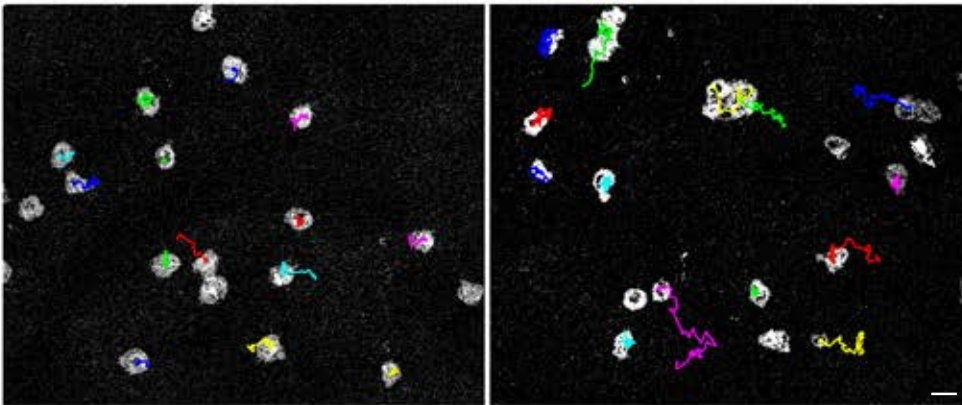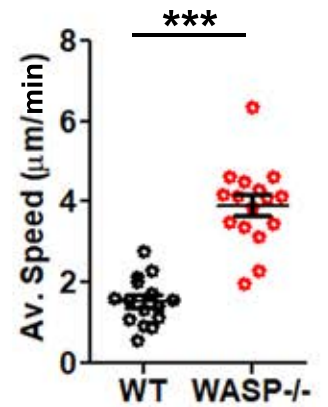

# Supp. fig.8

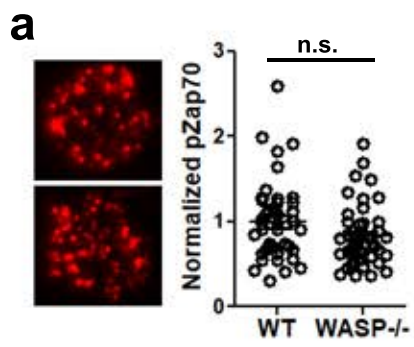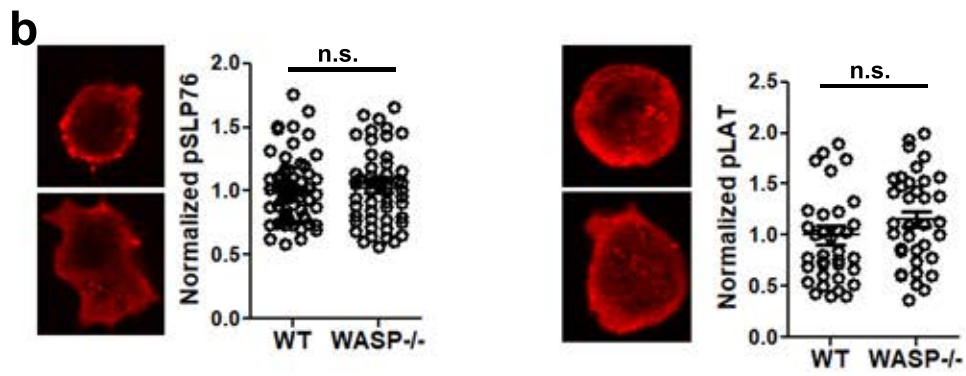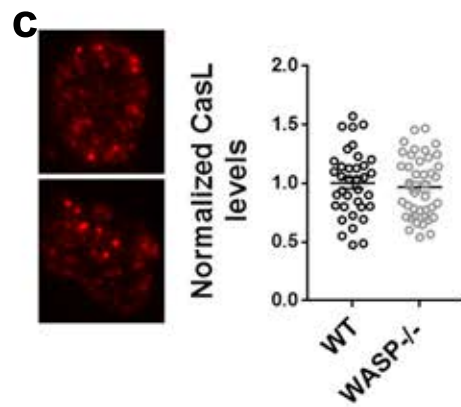



# Supp. fig.9

**a**

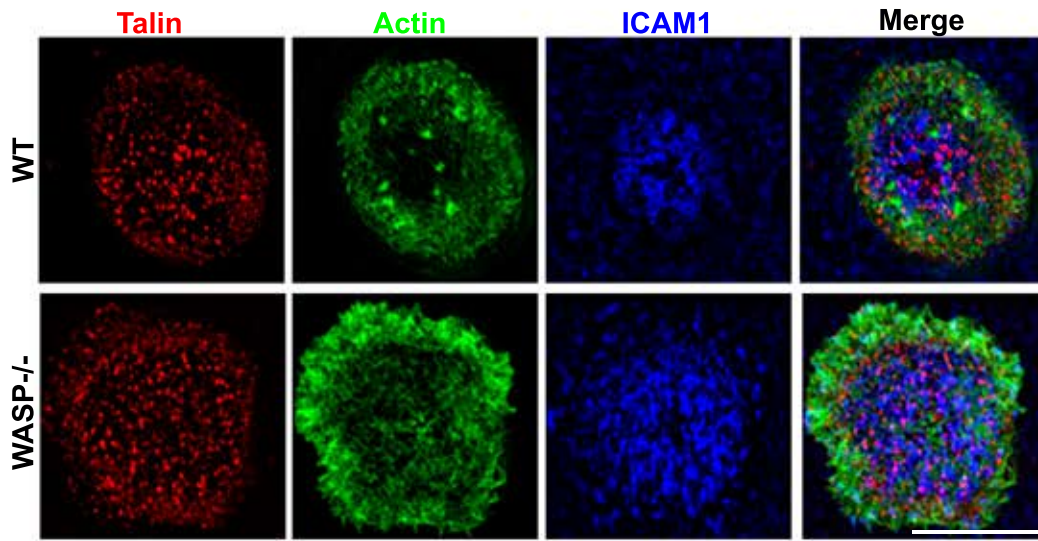

**b**

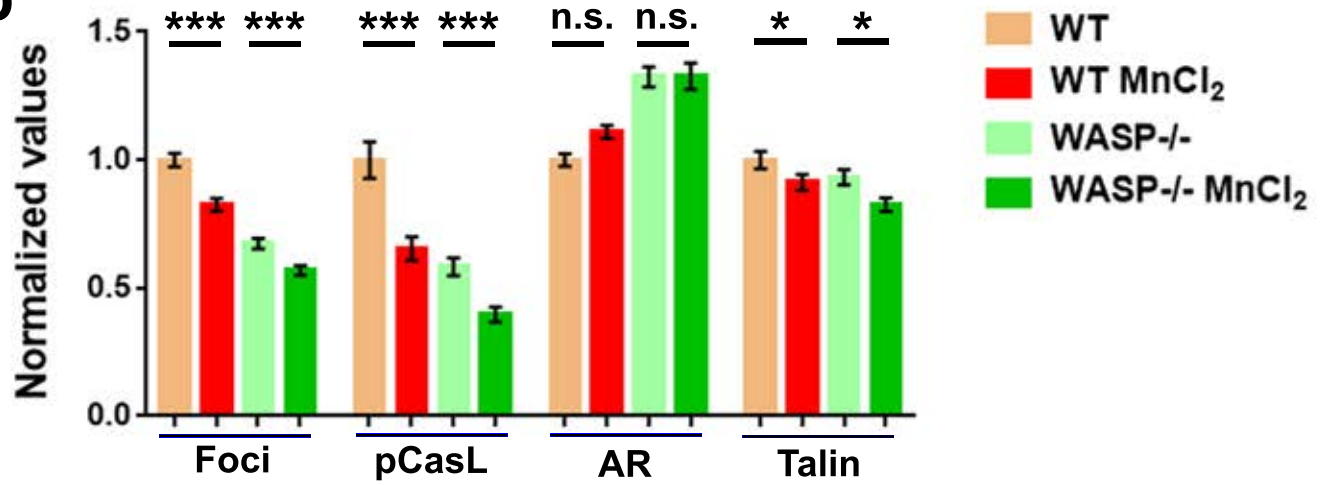

# Supp. fig. 10

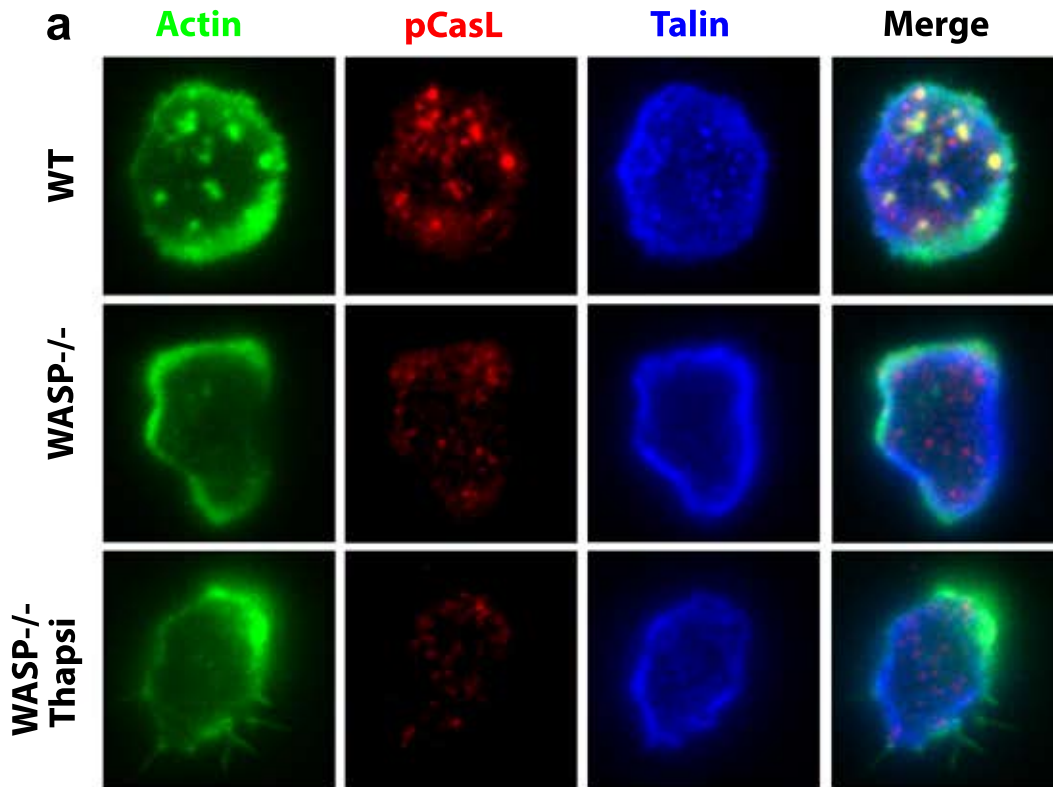

**b**

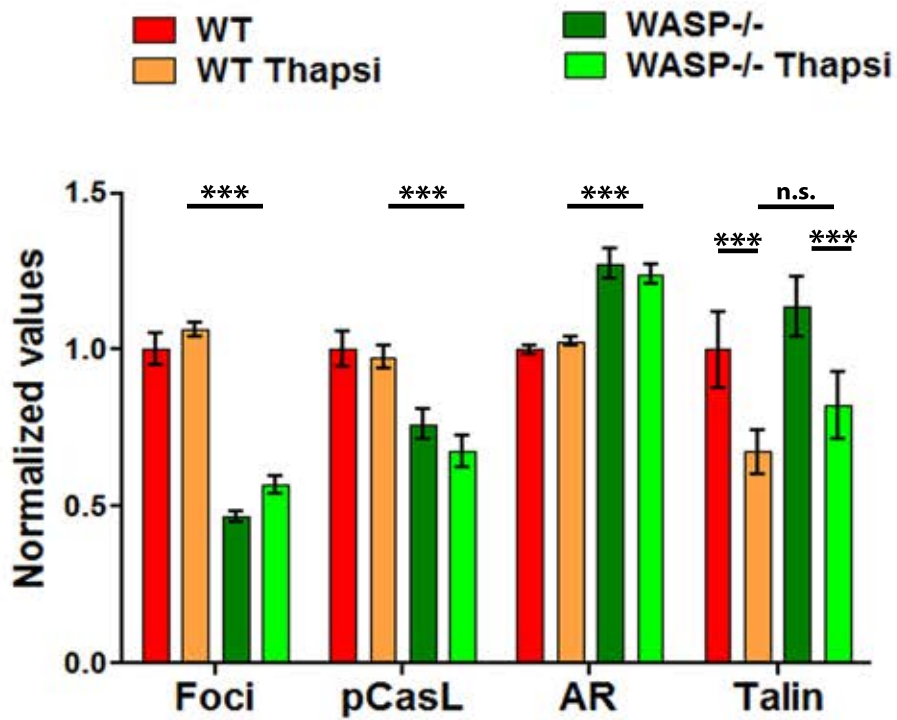

# Supp. fig.11

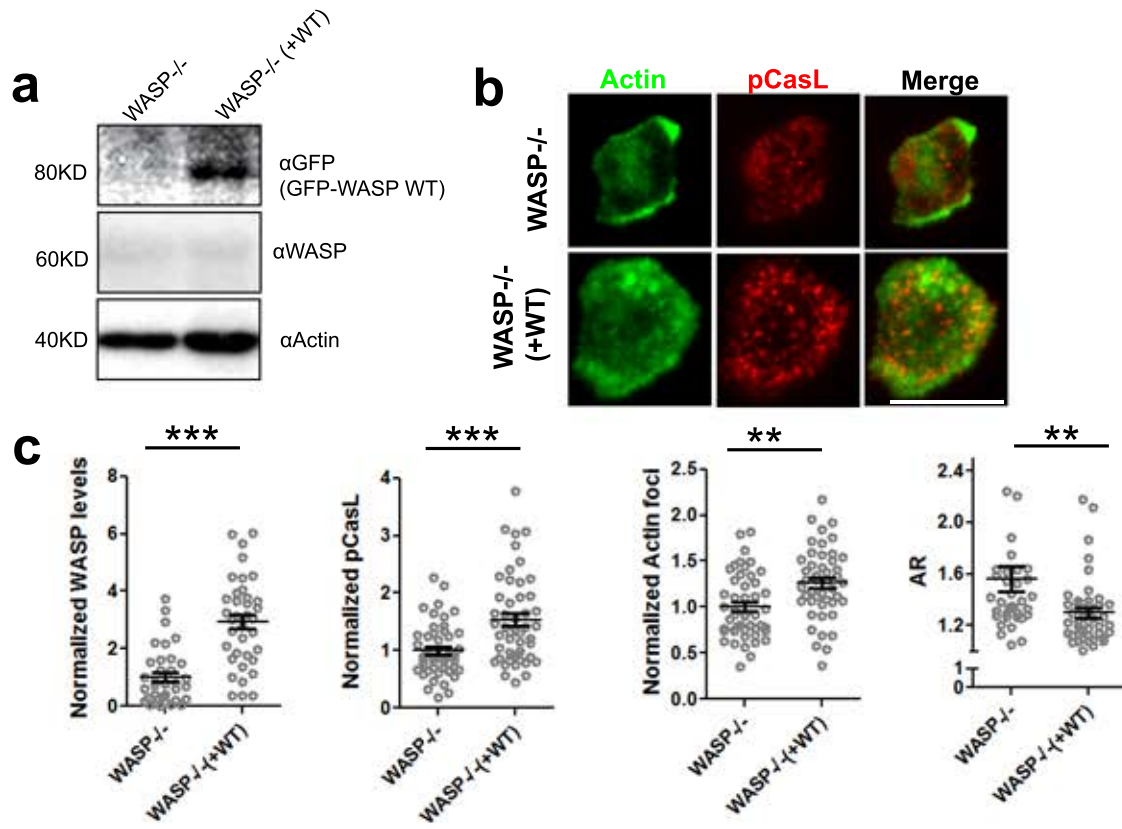

# Supp. fig.12

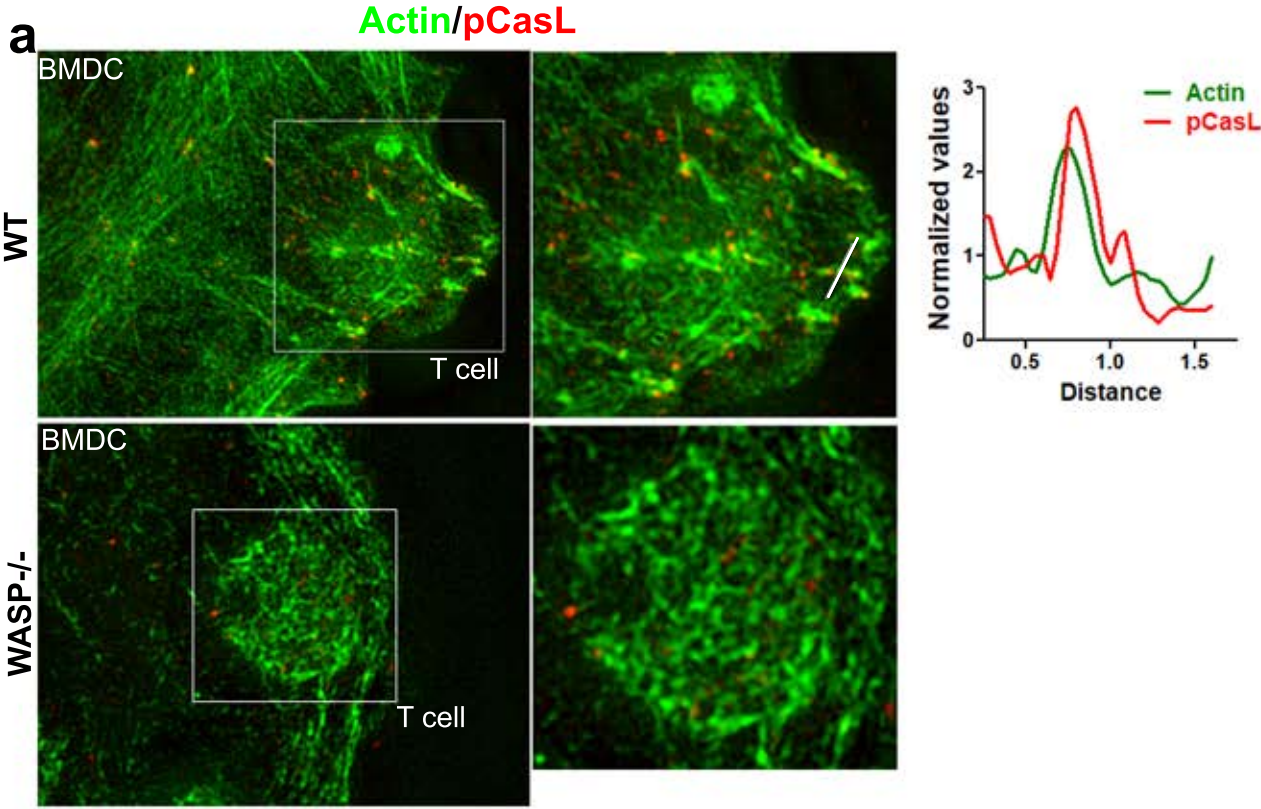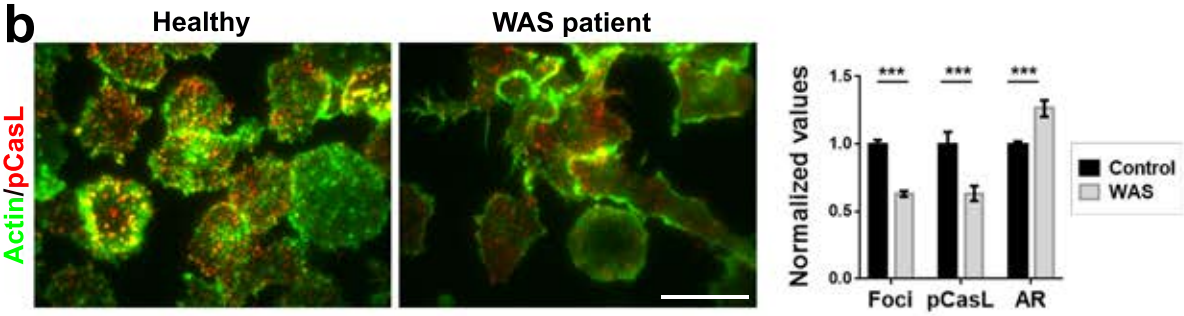

# Supp. fig.13

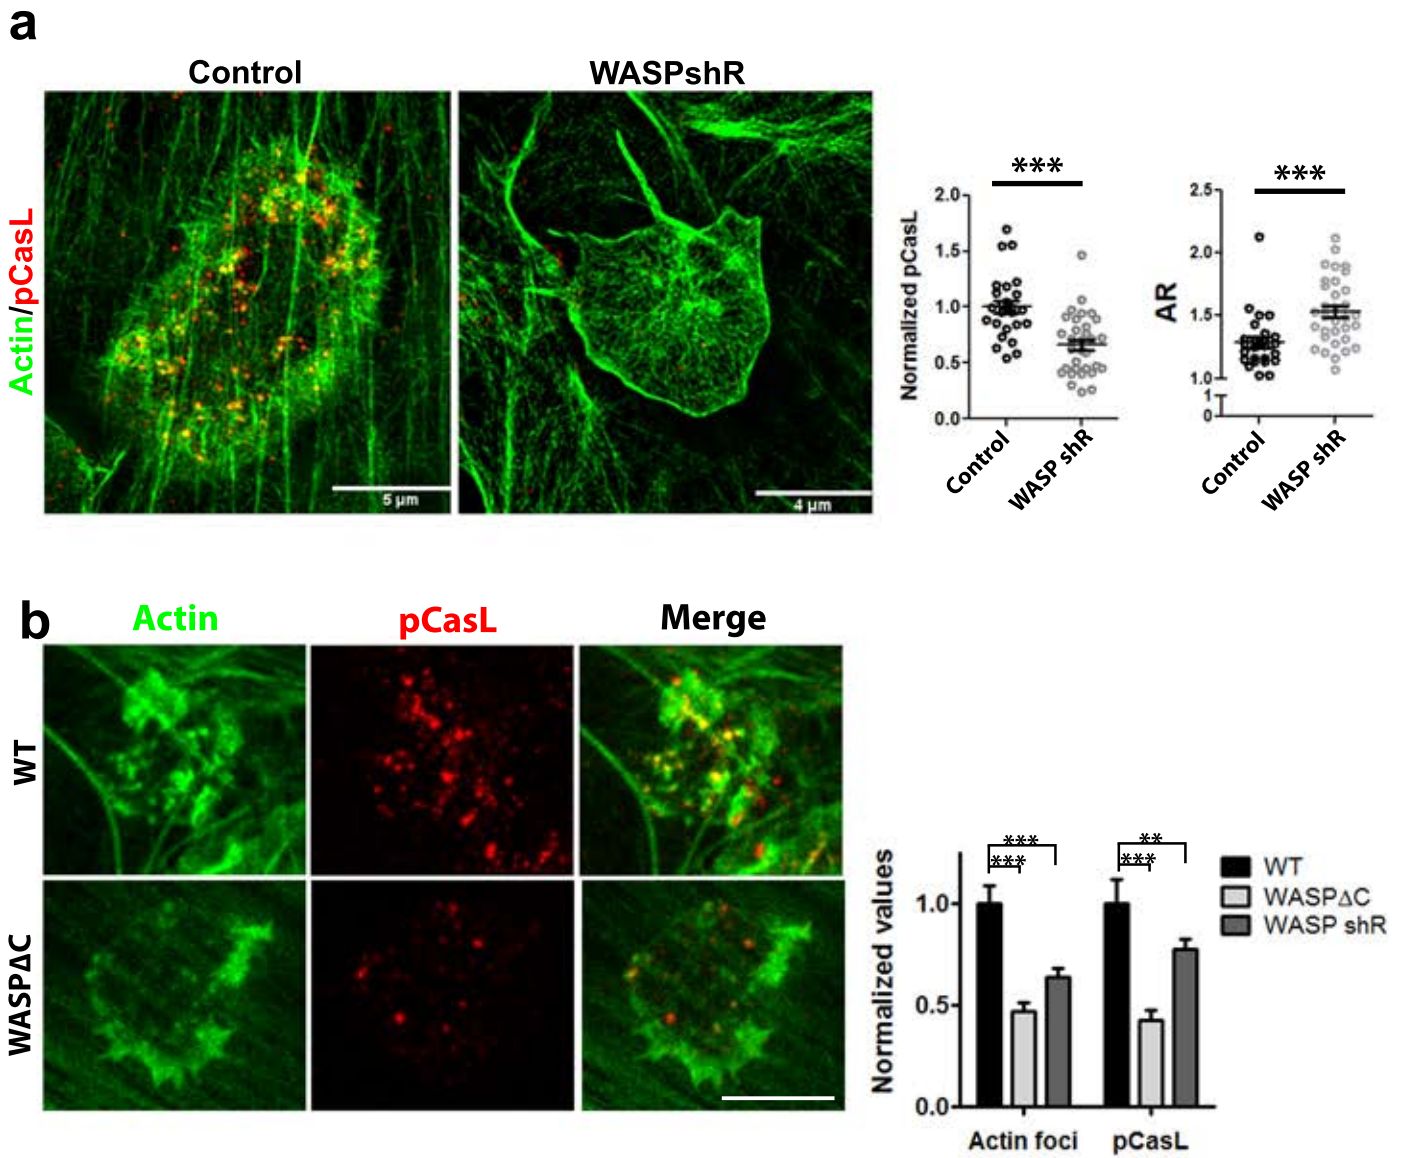

Supplement: Supplementary file [file 437236-1.pdf]
