# Supplementary material for: Cytoskeletal tension actively sustains the migratory T cell synaptic contact
Source: bioRxiv or medRxiv preprint supplement (doi:10.1101/437236), 2019-05-04
Supplement: Supplementary file [file 437236-3.pdf]

**Supplementary Table 1:** Model parameters. Parameter values are similar to those used in our previous work where the entire parameter list can be found (1, 2). This table shows values important and/or tuned in this study.

| Symbol            | Definition                                                         | Value                                            |
|-------------------|--------------------------------------------------------------------|--------------------------------------------------|
| $C_A$             | Actin concentration                                                | 25 [ $\mu\text{M}$ ]                             |
| % Motors          | [Ratio of $C_M$ to $C_A$ ] $\times$ 100                            | 1                                                |
| % ACPs            | [Ratio of $C_{ACP}$ to $C_A$ ] $\times$ 100                        | 1                                                |
| $k_{u,ACP}^0$     | Zero-force unbinding rate coefficient of ACP                       | 0.115 [ $\text{s}^{-1}$ ](3)                     |
| $\lambda_{u,ACP}$ | Compliance of a bond for ACP unbinding                             | $1.04 \times 10^{-10}$ [m](3)                    |
| $k_{a,p}$         | Actin polymerization rate                                          | 0.3 [ $\mu\text{M}^{-1} \text{s}^{-1}$ ]         |
| $k_{a,d}$         | Actin depolymerization rate                                        | 0.3 [ $\text{s}^{-1}$ ]                          |
| $k_{a,n}$         | Actin nucleation rate                                              | $n * 0.001$ [ $\mu\text{M}^{-1} \text{s}^{-1}$ ] |
| $n$               | Actin turnover scaling factor                                      | 1, at foci<br>0.01, at edges                     |
| $k_{adh,unb}$     | Zero-force unbinding rate of adhesions between actin and substrate | $n_{adh} * k_{u,ACP}^0$                          |
| $\lambda_{u,adh}$ | Compliance of a bond for adhesions                                 | $\lambda_{u,ACP}$                                |
| $n_{adh}$         | Adhesion unbinding scaling factor                                  | 0.1, at foci<br>10, at edges                     |

Note: The bonds linking actin filaments with actin filaments (ACPs) and actin filaments with the substrate (adhesions) are modeled as slip bonds via Bell's equation (4) with unbinding rates equal to:

$$k_u = k_u^0 \exp\left(\frac{\lambda_u |F|}{k_B T}\right)$$

where  $|F|$  is the tension acting on the bond,  $k_B$  is the Boltzmann constant, and  $T$  is temperature.

1. M. P. M. Wonyeong Jung, Taeyoon Kim, F-actin cross-linking enhances the stability of force generation in disordered actomyosin networks. *Computational Particle Mechanics* 2, 317 (2015).

2. M. Mak, M. H. Zaman, R. D. Kamm, T. Kim, Interplay of active processes modulates tension and drives phase transition in self-renewing, motor-driven cytoskeletal networks. *Nature communications* **7**, 10323 (Jan 8, 2016).
3. J. M. Ferrer *et al.*, Measuring molecular rupture forces between single actin filaments and actin-binding proteins. *Proceedings of the National Academy of Sciences of the United States of America* **105**, 9221 (Jul 8, 2008).
4. G. I. Bell, Models for the specific adhesion of cells to cells. *Science* **200**, 618 (May 12, 1978).
